# Supplementary material
Source: publisher figshare collection journal article supplement (https://springernature.figshare.com/ndownloader/files/30790726)
Supplement: Supplementary file [file 30790726]

**Table 2.** Explanation for the sample sizes used in the analysis. Total number of birds with GPS transmitters in the spring 2019 was 19 and three more transmitters were deployed during the summer. In the spring 2020, 50 birds were fitted with GPS-transmitters and transmitters were not deployed during the summer.

| Event                                                                 | n  | Explanation for sample size                                                                                                |
|-----------------------------------------------------------------------|----|----------------------------------------------------------------------------------------------------------------------------|
| Beginning of moult migration (non-breeders) in 2019                   | 7  | All (19) - breeders (11) - one that stopped sending before departure                                                       |
| Beginning of moult migration (non-breeders) in 2020                   | 26 | All (50) - 22 breeders - two birds from pairs                                                                              |
| Breeding success 2019                                                 | 10 | All breeders (11) - one dead (faith of brood unknown)                                                                      |
| Breeding success 2020                                                 | 20 | All breeders (22) - two dead (faith of brood unknown)                                                                      |
| Time lag between nest/brood loss and the beginning of moult migration | 16 | Failed breeders in 2019 (4) and 2020 (14) - one predated during incubation - one to avoid pseudorep.                       |
| Arrival to NZ in 2019                                                 | 10 | All (19) - dead (3) - stopped sending (2) - successful breeders (4)                                                        |
| Arrival to NZ in 2020                                                 | 39 | All (50) - successful breeders (6) - dead (3) - two birds from pairs                                                       |
| Time lag between arrival to NZ and beginning of moult                 | 42 | All that arrived to NZ in 2019 (10) and 2020 (41) - seven to avoid pseudorep. - two birds from pairs                       |
| Beginning and end of moult in 2019                                    | 10 | All that arrived to NZ in 2019                                                                                             |
| Beginning and end of moult in 2020                                    | 41 | All that arrived to NZ in 2020                                                                                             |
| Beginning and end of moult in merged data                             | 44 | All that arrived to NZ in 2019 (10) and 2020 (41) - seven to avoid pseudorep. - two birds from pairs                       |
| Utilization distribution during moult                                 | 41 | All that arrived to NZ in 2019 (10) and 2020 (41) - seven to avoid pseudoreplication - three with location interval of 2 h |
| Departure from NZ 2019                                                | 10 | All that arrived to NZ in 2019                                                                                             |
| Departure from NZ 2020                                                | 39 | All that arrived to NZ in 2020 - two birds from pairs                                                                      |
| Time lag between the end of moult and departure from NZ in 2019       | 10 | All that arrived to NZ in 2019                                                                                             |
| Time lag between the end of moult and departure from NZ in 2020       | 39 | All that arrived to NZ in 2020 - two birds from pairs                                                                      |
| Arrival to Sweden 2019 (moult migrants)                               | 10 | All that arrived to NZ in 2019                                                                                             |
| Arrival of to Sweden 2020 (moult migrants)                            | 38 | All that arrived to NZ in 2020 - two birds from pairs - one died in Finland                                                |
| Arrival of to Sweden in 2019 (successful breeders)                    | 7  | Successful breeders (4) + three birds marked during summer in Finland (all successful breeders)                            |
| Arrival of to Sweden in 2020 (successful breeders)                    | 6  | Successful breeders                                                                                                        |
| Stopovers in Finland 2019                                             | 10 | All that arrived to NZ in 2019                                                                                             |
| Stopovers in Finland 2020                                             | 39 | All that arrived to NZ in 2020 - two birds from pairs                                                                      |
